# Supplementary material for: Sensing Leakage of Electrolytes from Magnesium Batteries Enabled by Natural AIEgens
Source: MDPI journal article supplement (doi:10.3390/ijms231810440), 2022-09-09
Supplement: s1 [file s1]

## **Supporting Information**

### **Sensing Leakage of Electrolytes from Magnesium Batteries**

#### **Enabled by Natural AIEgens**

*Yingxiang Zhai, Jiguo Zhang, Jian Li, Shouxin Liu, Zhijun Chen\* and*

*Shujun Li\**

Key Laboratory of Bio-based Material Science and Technology of Ministry of  
Education, Northeast Forestry University, Hexing Road 26, Harbin 150040,  
China

\*Email: [chenzhijun@nefu.edu.cn](mailto:chenzhijun@nefu.edu.cn) (Z.C.); [lishujun@nefu.edu.cn](mailto:lishujun@nefu.edu.cn) (S.L.)

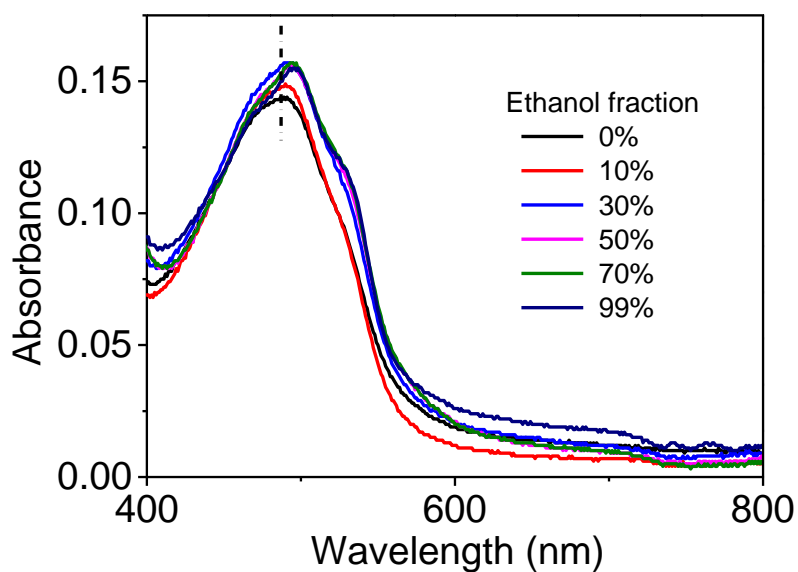

**Figure S1.** UV-Vis spectra of L-AIEgen (10 ppm) in mixtures of water and ethanol.

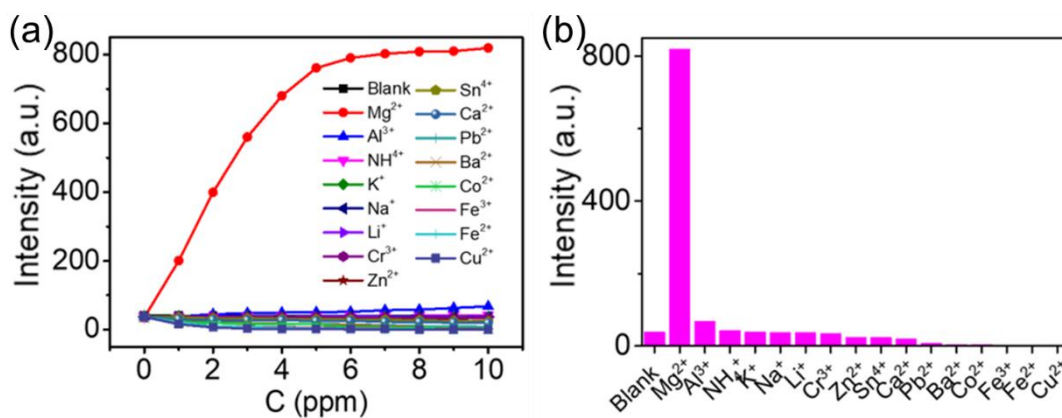

**Figure S2.** Fluorescence emission of L-AIEgen (10 ppm, 2.5 mL) in the presence of different cations. Ex = 520 nm, Em = 586 nm. (a) Fluorescence emission titrations (0-10 ppm) of L-AIEgen in the presence of different cations. (b) The fluorescence comparison of L-AIEgen at 586 nm upon adding 10 ppm of different cations.

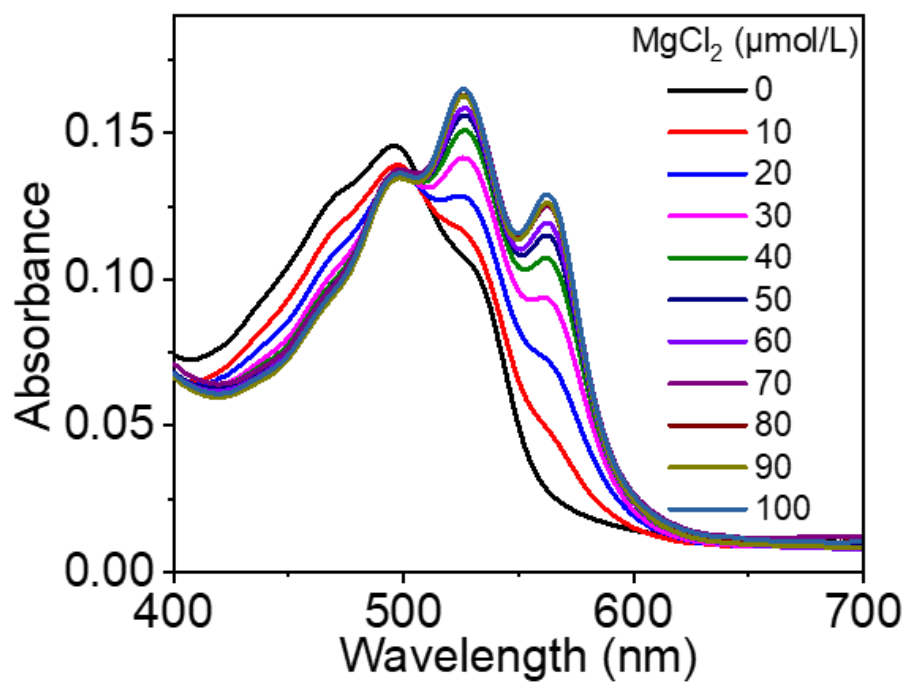

**Figure S3.** Changes in absorbance of L-AIEgen (10 ppm) in ethanol solution upon addition of  $\text{MgCl}_2$ .

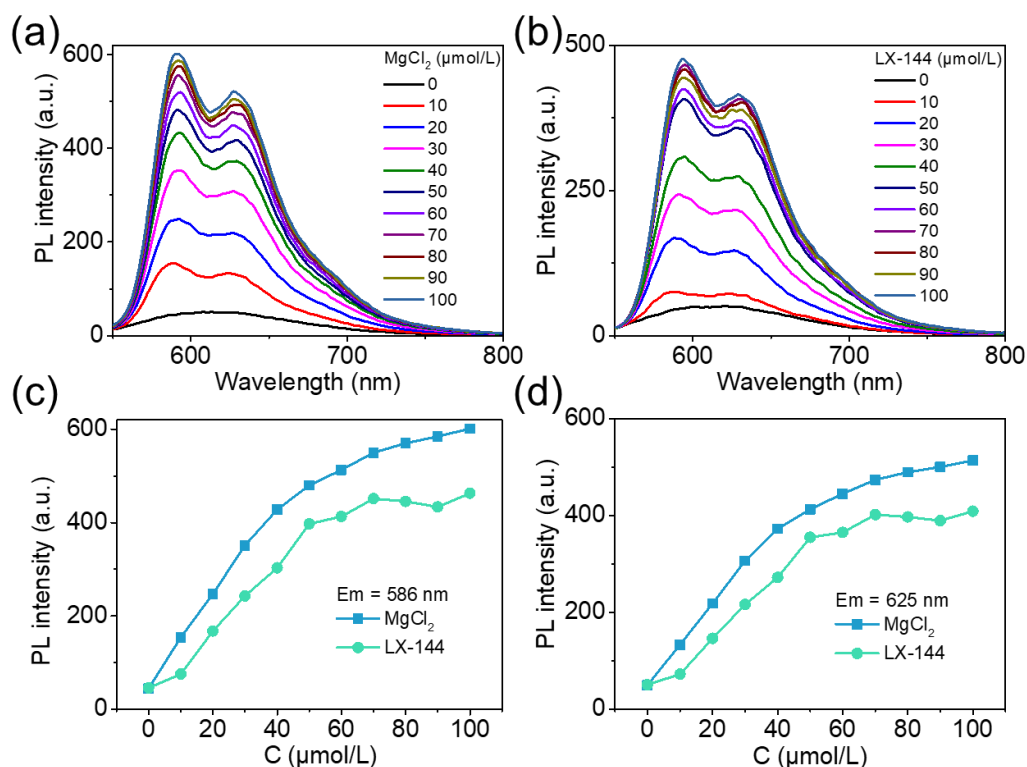

**Figure S4.** The effect of the same concentration of  $\text{Mg}^{2+}$  and LX-144 on the fluorescence intensity of L-AIEgen. (a) Changes in fluorescence of L-AIEgen (10 ppm) in ethanol solution upon addition of  $\text{MgCl}_2$  (0-100  $\mu\text{mol/L}$ ),  $\text{Ex} = 520 \text{ nm}$ ; (b) Changes in fluorescence of L-AIEgen (10 ppm) in ethanol solution upon addition of LX-144 (0-100  $\mu\text{mol/L}$ ),  $\text{Ex} = 520 \text{ nm}$ ; (c) Comparison of L-AIEgen fluorescence intensity after adding  $\text{Mg}^{2+}$  and LX-144,  $\text{Em} = 586 \text{ nm}$ ; (d) Comparison of L-AIEgen fluorescence intensity after adding  $\text{Mg}^{2+}$  and LX-144,  $\text{Em} = 625 \text{ nm}$ .

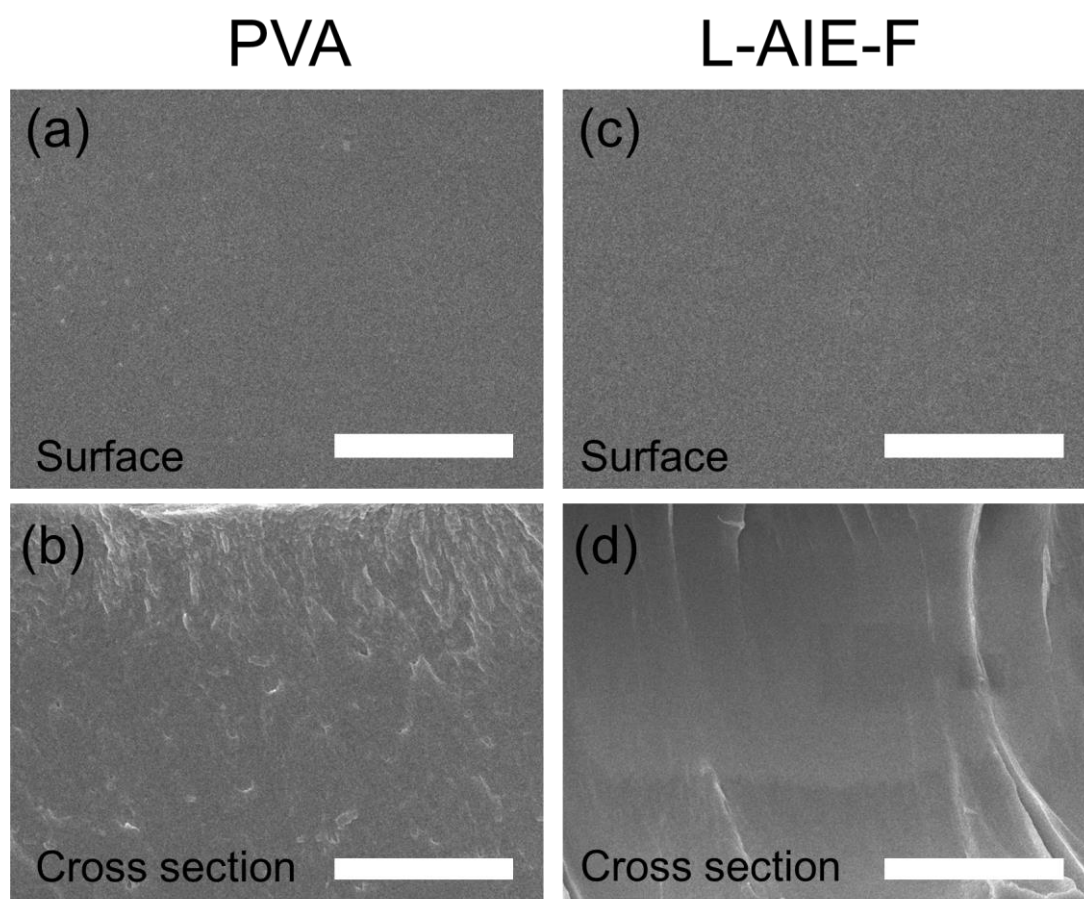

**Figure S5.** SEM images of the surface of (a) PVA and (c) L-AIE-F and cross section of (b) PVA and (d) L-AIE-F, scale bar = 5  $\mu\text{m}$ .

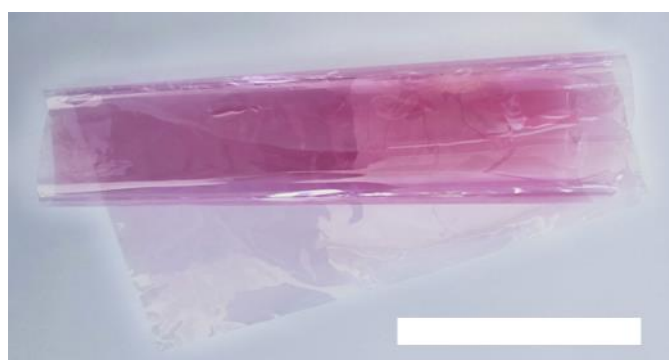

**Figure S6.** Image of L-AIE-F, scale bar = 5 cm.

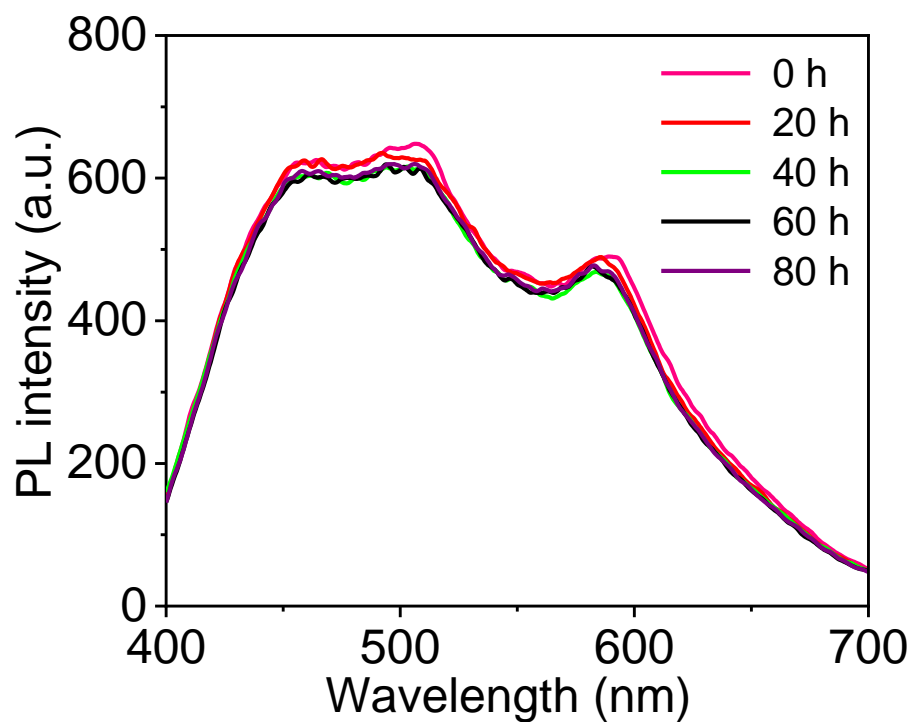

**Figure S7.** The fluorescence spectrum of L-AIE-F in the ambient state, excitation wavelength = 365 nm.

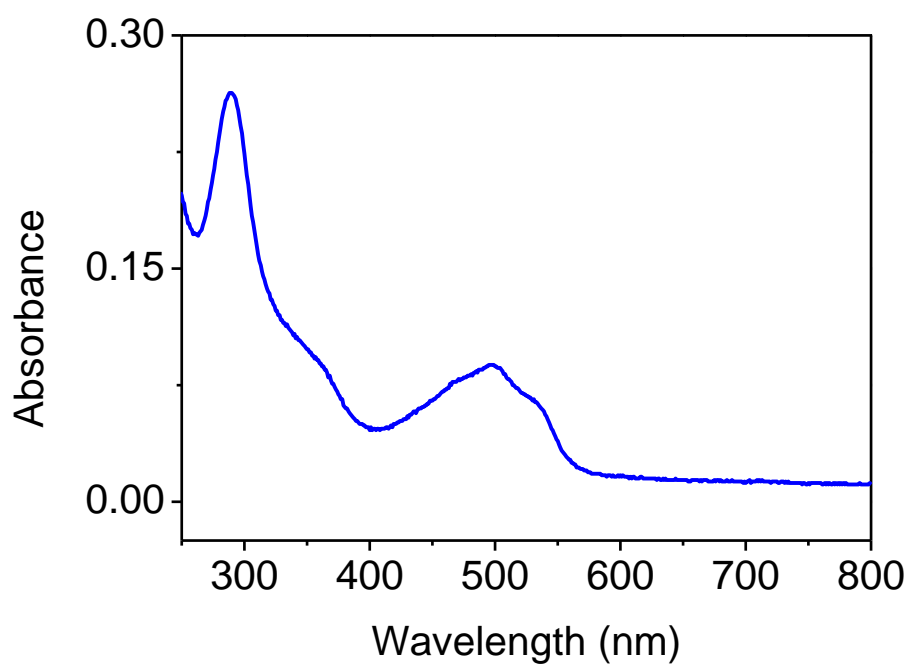

**Figure S8.** Absorbance of L-AIEgen in THF (10 ppm).

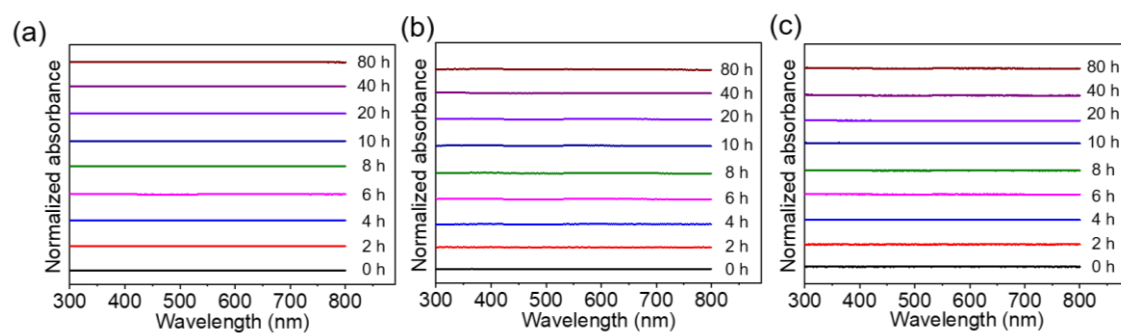

**Figure S9.** In situ measurement of absorbance of water (a), ethanol (b) and ethyl ether (c) in the presence of L-AIE-F ( $2\text{ cm} \times 2\text{ cm}$ ) for different periods of time.

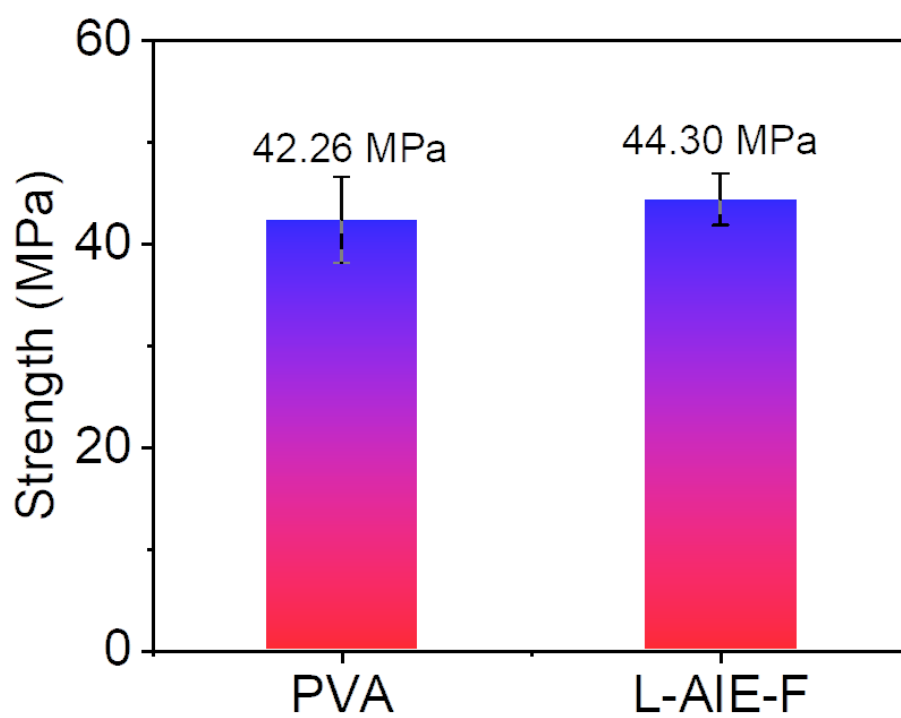

**Figure S10.** The tensile strength of L-AIE-F and PVA.

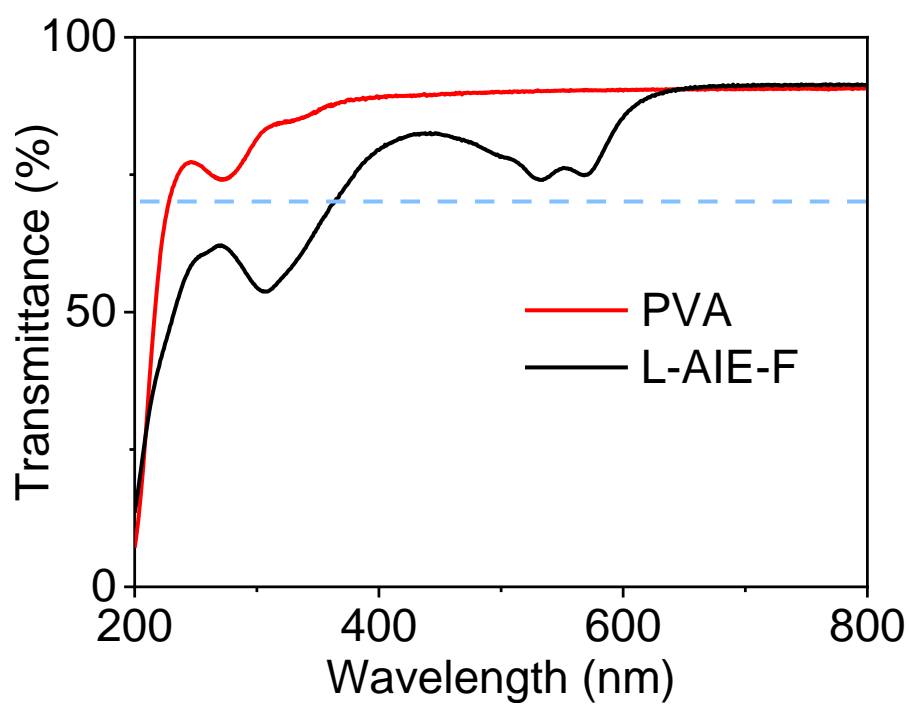

**Figure S11.** UV-vis light transmittance of PVA and L-AIE-F.

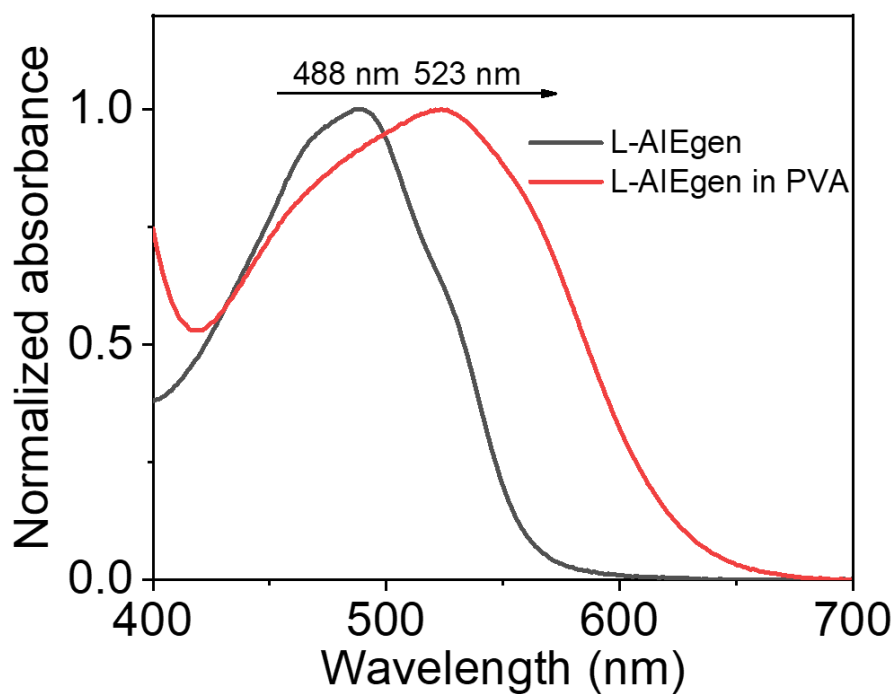

**Figure S12.** The normalized absorbance of aqueous L-AIEgen and L-AIEgen in aqueous PVA.



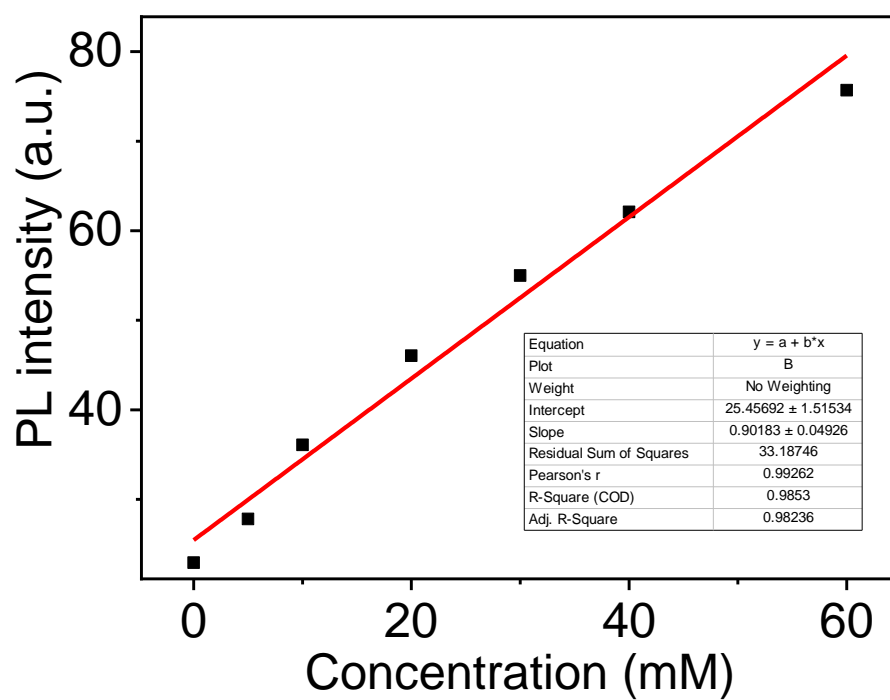

**Figure S13.** Linear fitting of PL intensity at 645 nm of L-AIE-F vs concentration of LX-144 (THF solution).
